# Supplementary material for: Towards a reference genome that captures global genetic diversity
Source: PubMed Central journal article supplement (PMC7599213; doi:10.1038/s41467-020-19311-w), 2020-10-30
Supplement: 41467_2020_19311_MOESM16_ESM.pdf [file 41467_2020_19311_MOESM16_ESM.pdf]

## Reporting Summary

Nature Research wishes to improve the reproducibility of the work that we publish. This form provides structure for consistency and transparency in reporting. For further information on Nature Research policies, see our [Editorial Policies](#) and the [Editorial Policy Checklist](#).

### Statistics

For all statistical analyses, confirm that the following items are present in the figure legend, table legend, main text, or Methods section.

n/a Confirmed

- |                                     |                                     |                                                                                                                                                                                                                                                            |
|-------------------------------------|-------------------------------------|------------------------------------------------------------------------------------------------------------------------------------------------------------------------------------------------------------------------------------------------------------|
| <input type="checkbox"/>            | <input checked="" type="checkbox"/> | The exact sample size ( $n$ ) for each experimental group/condition, given as a discrete number and unit of measurement                                                                                                                                    |
| <input checked="" type="checkbox"/> | <input type="checkbox"/>            | A statement on whether measurements were taken from distinct samples or whether the same sample was measured repeatedly                                                                                                                                    |
| <input type="checkbox"/>            | <input checked="" type="checkbox"/> | The statistical test(s) used AND whether they are one- or two-sided<br><i>Only common tests should be described solely by name; describe more complex techniques in the Methods section.</i>                                                               |
| <input checked="" type="checkbox"/> | <input type="checkbox"/>            | A description of all covariates tested                                                                                                                                                                                                                     |
| <input checked="" type="checkbox"/> | <input type="checkbox"/>            | A description of any assumptions or corrections, such as tests of normality and adjustment for multiple comparisons                                                                                                                                        |
| <input type="checkbox"/>            | <input checked="" type="checkbox"/> | A full description of the statistical parameters including central tendency (e.g. means) or other basic estimates (e.g. regression coefficient) AND variation (e.g. standard deviation) or associated estimates of uncertainty (e.g. confidence intervals) |
| <input type="checkbox"/>            | <input checked="" type="checkbox"/> | For null hypothesis testing, the test statistic (e.g. $F$ , $t$ , $r$ ) with confidence intervals, effect sizes, degrees of freedom and $P$ value noted<br><i>Give <math>P</math> values as exact values whenever suitable.</i>                            |
| <input checked="" type="checkbox"/> | <input type="checkbox"/>            | For Bayesian analysis, information on the choice of priors and Markov chain Monte Carlo settings                                                                                                                                                           |
| <input checked="" type="checkbox"/> | <input type="checkbox"/>            | For hierarchical and complex designs, identification of the appropriate level for tests and full reporting of outcomes                                                                                                                                     |
| <input checked="" type="checkbox"/> | <input type="checkbox"/>            | Estimates of effect sizes (e.g. Cohen's $d$ , Pearson's $r$ ), indicating how they were calculated                                                                                                                                                         |

*Our web collection on [statistics for biologists](#) contains articles on many of the points above.*

### Software and code

Policy information about [availability of computer code](#)

|                 |                                                                                                                                                                                                                                                                                                                                                                                                                                         |
|-----------------|-----------------------------------------------------------------------------------------------------------------------------------------------------------------------------------------------------------------------------------------------------------------------------------------------------------------------------------------------------------------------------------------------------------------------------------------|
| Data collection | Commercial tools: 10x Genomics Longranger v2 and Supernova v2                                                                                                                                                                                                                                                                                                                                                                           |
| Data analysis   | Commercial tools: 10x Genomics Longranger v2 and Supernova v2; bamtofastq; Nucmer; kalign; RepeatMasker; Paragraph; GATK v3.8-1 haplotypeCaller; STAR aligner; "topGO" package through R; Manta.<br>All custom source code can be found in the following github repository: <a href="https://github.com/wongkarenhy/Huamn_diversity_reference_pipeline.git">https://github.com/wongkarenhy/Huamn_diversity_reference_pipeline.git</a> . |

For manuscripts utilizing custom algorithms or software that are central to the research but not yet described in published literature, software must be made available to editors and reviewers. We strongly encourage code deposition in a community repository (e.g. GitHub). See the Nature Research [guidelines for submitting code & software](#) for further information.

### Data

Policy information about [availability of data](#)

All manuscripts must include a [data availability statement](#). This statement should provide the following information, where applicable:

- Accession codes, unique identifiers, or web links for publicly available datasets
- A list of figures that have associated raw data
- A description of any restrictions on data availability

10xG de novo assemblies and FASTQ files of 327 samples (including 22 Illumina Polaris samples, 52 1KGP samples, 99 FGAP samples, and all 154 Taiwanese samples) were deposited under NCBI BioProject database under accession PRJNA588278 [<https://www.ncbi.nlm.nih.gov/bioproject/?term=PRJNA588278>]. Bionano BNX files were also deposited under the same BioProject. The Human Diversity Reference can be found in the following link [<http://kwoklab.ucsf.edu/resources/>]. All other relevant materials can be obtained upon request. Blast non-redundant nucleotide database was downloaded here: [<https://ftp.ncbi.nlm.nih.gov/blast/db/>]. Human and chimpanzee Refseq protein databases were obtained from UCSC genome table browser [<https://genome-euro.ucsc.edu/cgi-bin/hgTables>].

## Field-specific reporting

Please select the one below that is the best fit for your research. If you are not sure, read the appropriate sections before making your selection.

Life sciences       Behavioural & social sciences       Ecological, evolutionary & environmental sciences

For a reference copy of the document with all sections, see [nature.com/documents/nr-reporting-summary-flat.pdf](https://www.nature.com/documents/nr-reporting-summary-flat.pdf)

## Life sciences study design

All studies must disclose on these points even when the disclosure is negative.

|                 |                                                                    |
|-----------------|--------------------------------------------------------------------|
| Sample size     | 327                                                                |
| Data exclusions | None.                                                              |
| Replication     | Not replicated because sequencing resources are limited.           |
| Randomization   | Not applicable because study design depends on sample availability |
| Blinding        | Not applicable because study design depends on sample availability |

## Reporting for specific materials, systems and methods

We require information from authors about some types of materials, experimental systems and methods used in many studies. Here, indicate whether each material, system or method listed is relevant to your study. If you are not sure if a list item applies to your research, read the appropriate section before selecting a response.

### Materials & experimental systems

| n/a                                 | Involvement in the study                                        |
|-------------------------------------|-----------------------------------------------------------------|
| <input checked="" type="checkbox"/> | <input type="checkbox"/> Antibodies                             |
| <input type="checkbox"/>            | <input checked="" type="checkbox"/> Eukaryotic cell lines       |
| <input checked="" type="checkbox"/> | <input type="checkbox"/> Palaeontology and archaeology          |
| <input checked="" type="checkbox"/> | <input type="checkbox"/> Animals and other organisms            |
| <input type="checkbox"/>            | <input checked="" type="checkbox"/> Human research participants |
| <input checked="" type="checkbox"/> | <input type="checkbox"/> Clinical data                          |
| <input checked="" type="checkbox"/> | <input type="checkbox"/> Dual use research of concern           |

### Methods

| n/a                                 | Involvement in the study                        |
|-------------------------------------|-------------------------------------------------|
| <input checked="" type="checkbox"/> | <input type="checkbox"/> ChIP-seq               |
| <input checked="" type="checkbox"/> | <input type="checkbox"/> Flow cytometry         |
| <input checked="" type="checkbox"/> | <input type="checkbox"/> MRI-based neuroimaging |

## Eukaryotic cell lines

Policy information about [cell lines](#)

Cell line source(s)

Coriell Institute.HG00512

NA19238  
HG00250  
HG00251  
HG00351  
HG00353  
HG00513  
HG00622  
HG00732  
HG00844  
HG00851  
HG01140  
HG01176  
HG01464  
HG01761  
HG01762  
HG01970  
HG01971  
HG02108  
HG02283  
HG02521  
HG02522  
HG02603  
HG02604  
HG02623  
HG02635  
HG03115  
HG03123  
HG03451  
HG03470  
HG03796  
HG03797  
HG03838  
HG03863  
HG03864  
HG04006  
NA06986  
NA11832  
NA18552  
NA18557  
NA18991  
NA19068  
NA19102  
NA19239  
NA19440  
NA19444  
NA19719  
NA19789  
NA19921  
NA19984  
NA20587  
NA20588  
NA21125  
NA21126  
AK1  
CHM1  
CHM13  
HG01352  
HG02059  
HG02818  
NA12878  
NA19434  
HG00436  
HG00589

HG01190  
 NA12813  
 NA18855  
 NA18861  
 NA18868  
 NA18942  
 NA19007  
 NA19095  
 NA19109  
 NA19122  
 NA19174  
 NA19176  
 NA19178  
 NA19207  
 NA19213  
 NA19226  
 NA19819  
 NA19917  
 NA20296  
 NA20509

Authentication

Cell lines were authenticated by Coriell using a combination of VNTR and PCR using a panel of microsatellite markers.

Mycoplasma contamination

No mycoplasma contamination. DNA extraction only, no cell line studies.

Commonly misidentified lines  
 (See [ICLAC](#) register)

No commonly misidentified lines were used.

## Human research participants

Policy information about [studies involving human research participants](#)

Population characteristics

Our dataset includes 99 asymptomatic Full Genome Analysis Project (FGAP) participants representing different continental populations and 154 Taiwan Precision Medicine Initiative participants (mostly Han Chinese).

Recruitment

FGAP participants were referred to UCSF and they gave written informed consent prior to their enrollment in the study, which was approved by the Human Research Institutional Review Board as part of the UCSF Human Research Protection Program. The 154 Taiwanese subjects of Han Chinese ancestry in this study were recruited from the Taiwan Biobank (128), National Taiwan University Hospital (22), Taipei General Hospital (2), and Mackay Memorial Hospital (2). This study was approved by the Institutional Review Board of the respective recruitment hospitals and Academia Sinica, and ethical approval was granted by the Internal Review Board of the Taiwan Biobank.

Ethics oversight

UCSF Human Research Protection Program and the Internal Review Board of the Taiwan Biobank.

Note that full information on the approval of the study protocol must also be provided in the manuscript.
